# Supplementary material
Source: Elsevier journal article supplement (https://www.sciencedirect.com/science/article/pii/S0210570521001163)
Supplement: mmc1 [file S0210570521001163:mmc1.docx]

**Cuestionario de calidad de vida IBDQ-32**

MARQUE CON UN CÍRCULO LA RESPUESTA QUE CORRESPONDE MÁS EXACTAMENTE

CON SU SITUACIÓN DURANTE LAS ÚLTIMAS DOS SEMANAS

1. ¿Con qué frecuencia ha evacuado el intestino durante las últimas dos

semanas?

- Más frecuentemente que nunca
- Extremada frecuencia
- Con mucha frecuencia
- Moderado aumento de la frecuencia de defecación
- Ligero aumento de la frecuencia de defecación
- Aumento mínimo de la frecuencia de defecación
- Normal, sin ningún aumento de la frecuencia de defecación

2. ¿Con qué frecuencia le ha causado problemas la sensación de

fatiga o de cansancio y agotamiento durante las últimas dos semanas?

- Siempre
- Casi siempre
- Bastantes veces
- A veces
- Pocas veces
- Casi nunca
- Nunca

3. ¿Con qué frecuencia se ha sentido frustrado, impaciente o inquieto

a causa de su problema intestinal durante las últimas

dos semanas?

- Siempre
- Casi siempre
- Bastantes veces
- A veces
- Pocas veces
- Casi nunca
- Nunca

4. ¿Con qué frecuencia se ha visto incapacitado para ir a estudiar

o al trabajo a causa de su problema intestinal durante las últimas

dos semanas?

- Siempre
- Casi siempre
- Bastantes veces
- A veces
- Pocas veces
- Casi nunca
- Nunca

5. ¿Durante cuánto tiempo en las últimas dos semanas ha tenido

diarrea?

- Siempre
- Casi siempre
- Bastantes veces
- A veces
- Pocas veces
- Casi nunca
- Nunca

6. ¿Cuánta energía ha tenido durante las últimas dos semanas?

- Ninguna energía
- Muy poca energía
- Poca energía
- Cierta energía
- Bastante energía
- Mucha energía
- Rebosante de energía

7. ¿Con qué frecuencia ha estado preocupado ante la posibilidad

de tener que operarse por su problema intestinal durante las últimas

dos semanas?

- Siempre
- Casi siempre
- Bastantes veces
- A veces
- Pocas veces
- Casi nunca
- Nunca

8. ¿Con qué frecuencia ha tenido que aplazar o anular una cita o

compromiso social a causa de su problema intestinal durante

las últimas dos semanas?

- Siempre
- Casi siempre
- Bastantes veces
- A veces
- Pocas veces
- Casi nunca
- Nunca

9. ¿Con qué frecuencia ha tenido retortijones durante las últimas

dos semanas?

- Siempre
- Casi siempre
- Bastantes veces
- A veces
- Pocas veces
- Casi nunca
- Nunca

10. ¿Con qué frecuencia ha tenido malestar general durante las

últimas dos semanas?

- Siempre
- Casi siempre
- Bastantes veces
- A veces
- Pocas veces
- Casi nunca
- Nunca

11. ¿Con que frecuencia ha estado preocupado por temor a no

encontrar un baño cerca durante las últimas dos semanas?

- Siempre
- Casi siempre
- Bastantes veces
- A veces
- Pocas veces
- Casi nunca
- Nunca

12. ¿Qué dificultad ha tenido, a causa de su problema intestinal,

en las actividades de ocio o deportes que le hubiera gustado

hacer durante las últimas dos semanas?

- Muchísima dificultad; imposible hacer actividades
- Mucha dificultad
- Bastante dificultad
- Algo de dificultad
- Un poco de dificultad
- Apenas ninguna dificultad
- Ninguna dificultad; mi problema intestinal no ha limitado
- mis actividades de ocio ni deportivas

13. ¿Con qué frecuencia ha tenido dolor abdominal durante las

últimas dos semanas?

- Siempre
- Casi siempre
- Bastantes veces
- A veces
- Pocas veces
- Casi nunca
- Nunca

14. ¿Con qué frecuencia ha tenido problemas porque se ha despertado

por la noche durante las últimas dos semanas?

- Siempre
- Casi siempre
- Bastantes veces
- A veces
- Pocas veces
- Casi nunca
- Nunca

15. ¿Con qué frecuencia se ha sentido deprimido o desanimado a

causa de su problema intestinal durante las últimas dos semanas?

- Siempre
- Casi siempre
- Bastantes veces
- A veces
- Pocas veces
- Casi nunca
- Nunca

16. ¿Con qué frecuencia durante las últimas dos semanas ha tenido

que dejar de asistir a actos sociales porque no había un baño

cerca?

- Siempre
- Casi siempre
- Bastantes veces
- A veces
- Pocas veces
- Casi nunca
- Nunca

17. En general, ¿hasta qué punto ha sido un problema tener gases

durante las últimas dos semanas?

- Un gran problema
- Un problema importante
- Bastante problemático
- Algo problemático
- Muy poco problemático
- Casi ningún problema
- Ningún problema

18. En general, ¿hasta qué punto ha sido un problema durante las

últimas dos semanas el mantener o llegar al peso que a usted le

gustaría?

- Un gran problema
- Un problema importante
- Bastante problemático
- Algo problemático
- Muy poco problemático
- Casi ningún problema
- Ningún problema

19. Muchos pacientes con un problema intestinal tienen frecuentes

preocupaciones y angustias a causa de su enfermedad. En

general, ¿con qué frecuencia durante las últimas dos semanas

se ha sentido preocupado o angustiado por llegar a tener cáncer,

o por pensar que nunca más volvería a encontrarse bien,

o por tener una recaída?

- Siempre
- Casi siempre
- Bastantes veces
- A veces
- Pocas veces
- Casi nunca
- Nunca

20. ¿Con qué frecuencia durante las últimas dos semanas ha tenido

una sensación de hinchazón abdominal?

- Siempre
- Casi siempre
- Bastantes veces
- A veces
- Pocas veces
- Casi nunca
- Nunca

21. ¿Con qué frecuencia durante las últimas dos semanas se ha

sentido relajado y libre de tensión?

- Nunca
- 2. Casi nunca
- 3. Pocas veces
- 4. A veces
- 5. Bastantes veces
- 6. Casi siempre
- 7. Siempre

22. ¿Cuántas veces durante las últimas dos semanas ha tenido

problemas de sangrar al evacuar?

- Siempre
- Casi siempre
- Bastantes veces
- A veces
- Pocas veces
- Casi nunca
- Nunca

23. ¿Con qué frecuencia durante las últimas dos semanas se ha

sentido avergonzado en público por olores desagradables o

ruidos causados por su problema intestinal?

- Siempre
- Casi siempre
- Bastantes veces
- A veces
- Pocas veces
- Casi nunca
- Nunca

24. ¿Con qué frecuencia durante las últimas dos semanas ha tenido

ganas de ir al baño sin realmente evacuar?

- Siempre
- Casi siempre
- Bastantes veces
- A veces
- Pocas veces
- Casi nunca
- Nunca

25. ¿Con qué frecuencia se ha sentido deprimido, lloroso o desanimado

a causa de su problema intestinal durante las últimas

dos semanas?

- Siempre
- Casi siempre
- Bastantes veces
- A veces
- Pocas veces
- Casi nunca
- Nunca

26. ¿Con qué frecuencia durante las últimas dos semanas ha

manchado accidentalmente su ropa interior?

- Siempre
- Casi siempre
- Bastantes veces
- A veces
- Pocas veces
- Casi nunca
- Nunca

27. ¿Con qué frecuencia durante las últimas dos semanas se ha

sentido enojado a causa de su problema intestinal?

- Siempre
- Casi siempre
- Bastantes veces
- A veces
- Pocas veces
- Casi nunca
- Nunca

28. En general, durante las últimas dos semanas, ¿hasta qué punto

su problema intestinal ha sido un problema para sus relaciones

sexuales?

- Un gran problema
- Un problema importante
- Bastante problemático
- Algo problemático
- Muy poco problemático
- Casi ningún problema
- Ningún problema

29. ¿Con qué frecuencia ha tenido náuseas o ganas de vomitar

durante las últimas dos semanas?

- Siempre
- Casi siempre
- Bastantes veces
- A veces
- Pocas veces
- Casi nunca
- Nunca

30. ¿Con qué frecuencia se ha sentido de mal humor durante las

últimas dos semanas?

- Siempre
- Casi siempre
- Bastantes veces
- A veces
- Pocas veces
- Casi nunca
- Nunca

31. ¿Con qué frecuencia durante las últimas dos semanas se ha

sentido incomprendido por los demás?

- Siempre
- Casi siempre
- Bastantes veces
- A veces
- Pocas veces
- Casi nunca
- Nunca

32. ¿Hasta qué punto ha estado satisfecho, contento o feliz con

su vida personal durante las últimas dos semanas?

- Muy insatisfecho, infeliz
- Bastante insatisfecho, infeliz
- Algo insatisfecho, descontento
- Algo satisfecho, contento
- Bastante satisfecho, contento
- Muy satisfecho, feliz
- Extremadamente satisfecho, no podría ser más feliz
